# Supplementary material for: Microscopic and Biochemical Hallmarks of BICD2-Associated Muscle Pathology toward the Evaluation of Novel Variants
Source: MDPI journal article supplement (doi:10.3390/ijms24076808), 2023-04-06
Supplement: s1 [file s1]

**Supplementary Table S1**

| <i>BICD2</i> variant                                           | Classification (ACMG criteria)               | Prediction programs                                                                                                                  | conservation | Frequency in GnomAD | Reported in ClinVar database (number of entries)       | Reported in the literature                                                                                                               |
|----------------------------------------------------------------|----------------------------------------------|--------------------------------------------------------------------------------------------------------------------------------------|--------------|---------------------|--------------------------------------------------------|------------------------------------------------------------------------------------------------------------------------------------------|
| <u>p1</u><br>c.320C>T,<br>p.(Ser107Leu)<br>rs398123028         | Pathogenic (PM1, PM2_sup, PP1, PS3, PS4_mod) | Mostly predicted as pathogenic:<br>MutationTaster: disease causing<br>PROVEAN: damaging<br>SIFT: damaging<br>Revel: 0.36 (uncertain) | Strong       | -                   | ClinVar: pathogenic (8)                                | Bansagi et al., 2017<br>Unger et al., 2016<br>Rossor et al., 2015<br>Neveling et al., 2013<br>Peeters et al., 2013<br>Oates et al., 2013 |
| <u>p2</u><br>c.1195C>T,<br>p.(Arg399Cys)<br>rs200542458        | Uncertain significance (BP4_sup, PM2_sup)    | Conflicting predictions:<br>MutationTaster: disease causing<br>PROVEAN: neutral<br>SIFT: tolerated<br>Revel: 0.21                    | Moderate     | 0.0000159           | ClinVar: uncertain significance (1), likely benign (1) | Not reported in literature                                                                                                               |
| <u>p3 and p4</u><br>c.2189G>A,<br>p.(Arg730His)<br>rs943974428 | Uncertain significance (PM2_sup, PM1)        | Mostly predicted as pathogenic:<br>MutationTaster: disease causing<br>PROVEAN: damaging<br>SIFT: damaging<br>Revel: 0.631            | Strong       | -                   | Not reported in ClinVar                                | Not reported in literature                                                                                                               |
| <u>p5 and p6</u><br>c.1904G>T,<br>p.(Arg635Leu)                | Uncertain significance (PM2_sup)             | Mostly predicted as pathogenic:<br>MutationTaster: disease causing<br>PROVEAN: damaging<br>SIFT: damaging<br>Revel: 0.525            | Strong       | -                   | Not reported in ClinVar                                | Not reported in literature                                                                                                               |
| <u>p7</u><br>c.2452A>G,<br>p.(Lys818Glu)<br>rs200341779        | Uncertain significance (BP4_mod)             | Conflicting predictions:<br>MutationTaster: disease causing<br>PROVEAN: neutral<br>SIFT: damaging<br>Revel: 0.112                    | Moderate     | 0.0000322           | ClinVar: likely benign (2)                             | Not reported in literature                                                                                                               |

NM\_001003800.1

| Variants in other genes                                                                        | Classification                      | Prediction programs                                                                                                                  | conservation                         | Frequency in GnomAD | Reported in ClinVar database                    | Reported in the literature      |
|------------------------------------------------------------------------------------------------|-------------------------------------|--------------------------------------------------------------------------------------------------------------------------------------|--------------------------------------|---------------------|-------------------------------------------------|---------------------------------|
| <p><u>p5 and p6</u></p> <p><i>FLNC</i><br/>c.2272G&gt;A,<br/>p.(Val758Met)<br/>rs371418145</p> | Uncertain significance              | <p>Mostly predicted as pathogenic:<br/>Mutationtaster: disease causing<br/>PROVEAN: damaging<br/>SIFT: damaging<br/>Revel: 0.506</p> | moderate<br>(conservation score low) | 0.0000725           | ClinVar: uncertain significance (5)             | Janin et al., 2017 (supplement) |
| <p><u>p7</u></p> <p><i>COL6A1</i><br/>c.1694G&gt;A,<br/>p.(Arg565Gln)<br/>rs886057155</p>      | Uncertain significance<br>(BP4_mod) | <p>Mostly predicted as benign:<br/>Mutationtaster: polymorphism<br/>PROVEAN: neutral<br/>SIFT: tolerated<br/>Revel: 0.175</p>        | weak                                 | 0.000026            | ClinVar: uncertain significance (4), benign (1) | Not reported in literature      |
